# Supplementary material
Source: PubMed Central journal article supplement (PMC3145493)

# PROTEOMICS

## Supporting Information for Proteomics

**DOI 10.1002/pmic.201000621**

Michael Specht, Mario Stanke, Mia Terashima, Bianca Naumann-Busch, Ingrid Janßen, Ricarda Höhner, Erik F. Y. Hom, Chun Liang  
and, Michael Hippler

**Concerted action of the new Genomic Peptide Finder  
and AUGUSTUS allows for automated proteogenomic annotation of the  
*Chlamydomonas reinhardtii* genome**

## GPF *Chlamydomonas reinhardtii* annotation impact

1. New gene (3 cases)
2. Gene split (1 case)
3. Gene merge (1 case)
4. Gene extension (43 cases)
5. Gene truncation (2 cases)
6. Gene internal adjustments (added exons) (6 cases)
7. Gene internal adjustments (miscellaneous) (8 cases)
8. Gene internal adjustments (removed exons) (4 cases)

### New gene (3 cases)

[GBrowse](#)

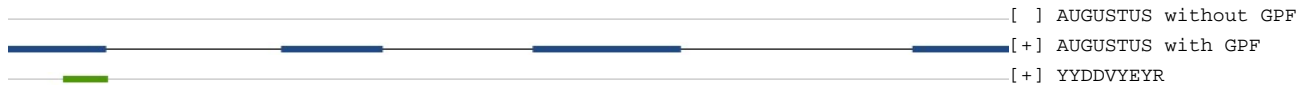

[GBrowse](#)

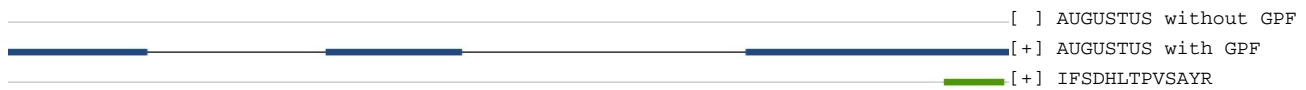

[GBrowse](#)

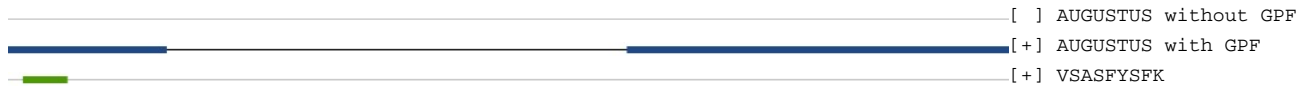

### Gene split (1 case)

[GBrowse](#)

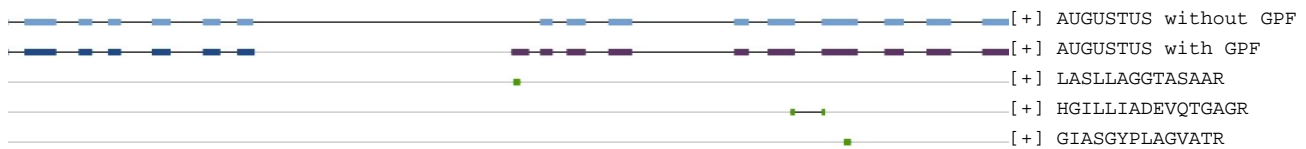

### Gene merge (1 case)

[GBrowse](#)

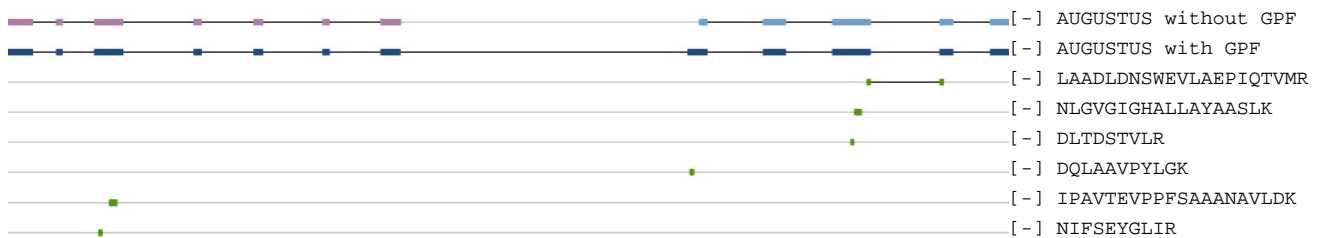

### Gene extension (43 cases)

[GBrowse](#)

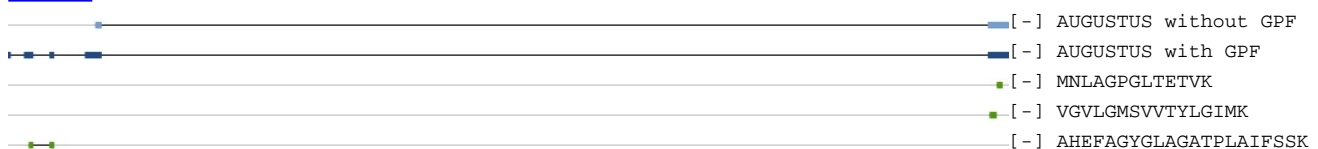

[GBrowse](#)

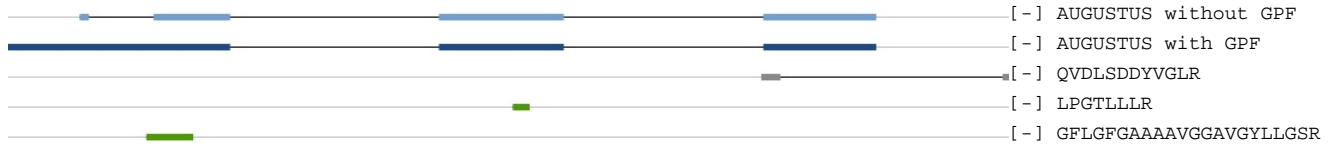

[GBrowse](#)

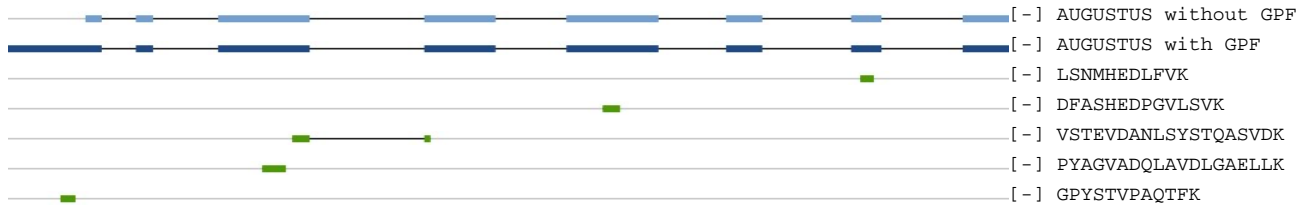

[GBrowse](#)

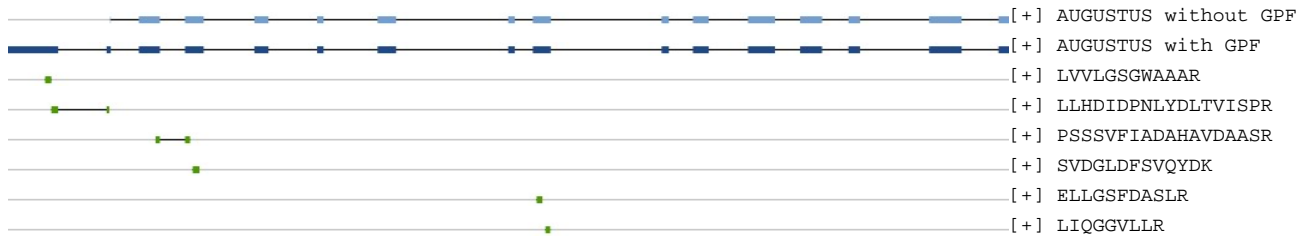

[GBrowse](#)

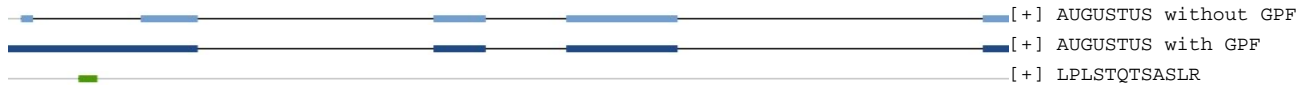

[GBrowse](#)

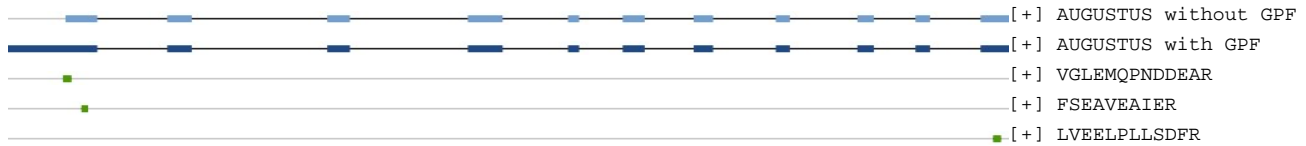

[GBrowse](#)

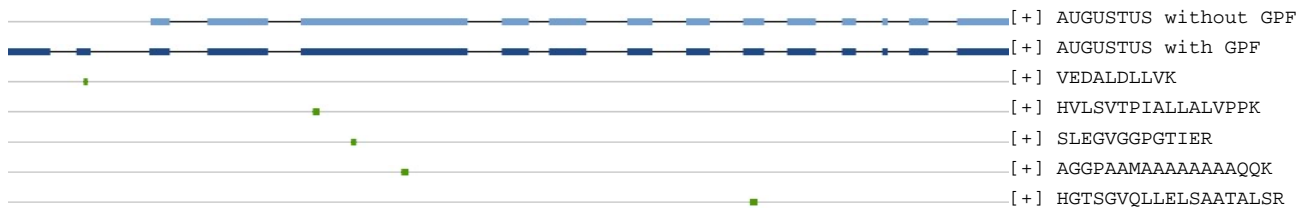

[GBrowse](#)

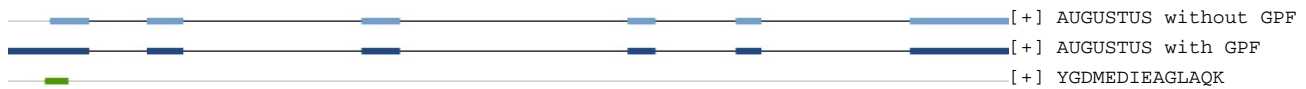

[GBrowse](#)

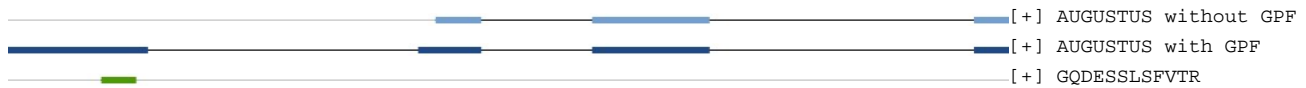

[GBrowse](#)

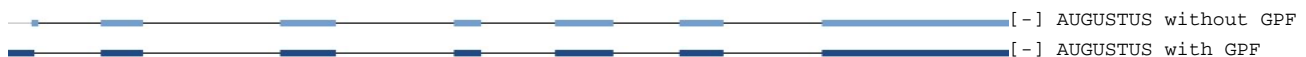

[-] SAEAGQAVIDSIR  
[-] TTAEQAIAGIDVK

[GBrowse](#)

[-] AUGUSTUS without GPF  
[-] AUGUSTUS with GPF  
[-] SAGWSIVNTPAGEVVGLPK  
[-] LEGATLEQYLSEK  
[-] DLLGGIPGFYESVR  
[-] VVQLANALETSR  
[-] SWSLDANVTLLR  
[-] LPQLEAYVDEQVANR

[GBrowse](#)

[+] AUGUSTUS without GPF  
[+] AUGUSTUS with GPF  
[+] VAAEDTVDAGIR

[GBrowse](#)

[-] AUGUSTUS without GPF  
[-] AUGUSTUS with GPF  
[-] VTLSADDLAALVDK

[GBrowse](#)

[+] AUGUSTUS without GPF  
[+] AUGUSTUS with GPF  
[+] GSYHNLAALVEGGLQEVQPSPLSGLGR  
[+] LIIVSNHLPLR  
[+] YLDGFSWDEFK  
[+] VNPWSVESTADGIYAAIK  
[+] APFYLNDPVEVLQLLAR

[GBrowse](#)

[+] AUGUSTUS without GPF  
[+] AUGUSTUS with GPF  
[+] PNAGDAAAQQAFSDVR  
[+] DLEEQLTTATR

[GBrowse](#)

[-] AUGUSTUS without GPF  
[-] AUGUSTUS with GPF  
[-] ADAPSDQLDTAMLR

[GBrowse](#)

[+] AUGUSTUS without GPF  
[+] AUGUSTUS with GPF  
[+] EDSLEDIDMAVLR

[GBrowse](#)

[-] AUGUSTUS without GPF  
[-] AUGUSTUS with GPF  
[-] ISGSDLVENLALDQR  
[-] SPEELNDPAQIGATGSASQR

[GBrowse](#)

[+] AUGUSTUS without GPF  
[+] AUGUSTUS with GPF  
[+] SHGGVNEEEAVEAAER  
[+] LLVEAGLGHLFFR

[GBrowse](#)

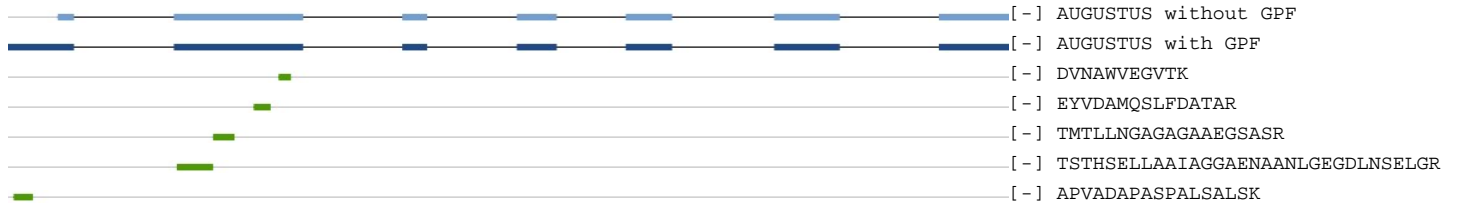

[GBrowse](#)

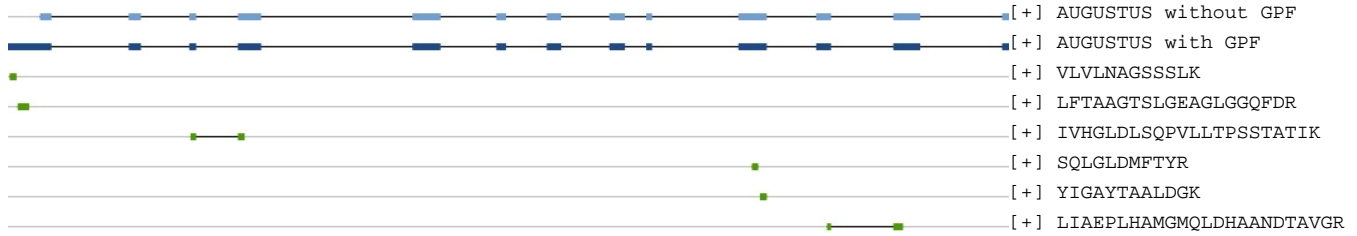

[GBrowse](#)

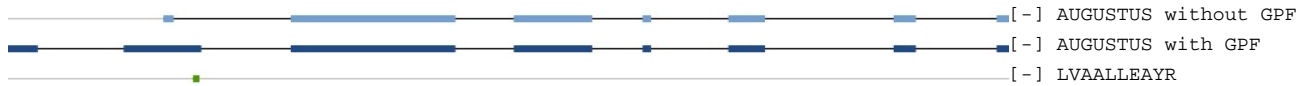

[GBrowse](#)

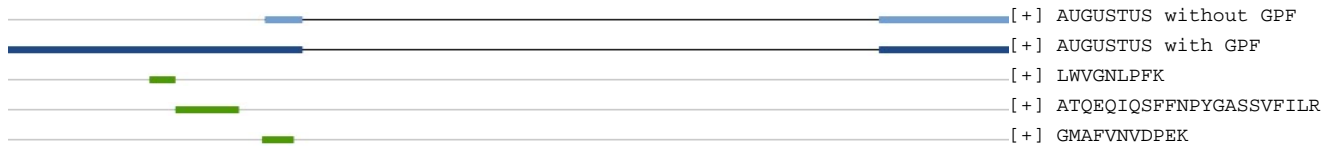

[GBrowse](#)

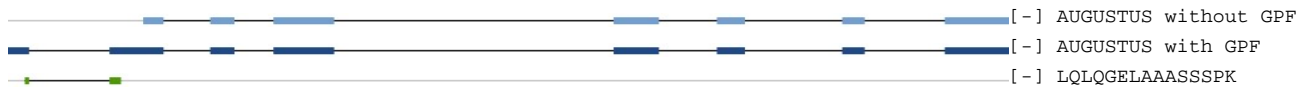

[GBrowse](#)

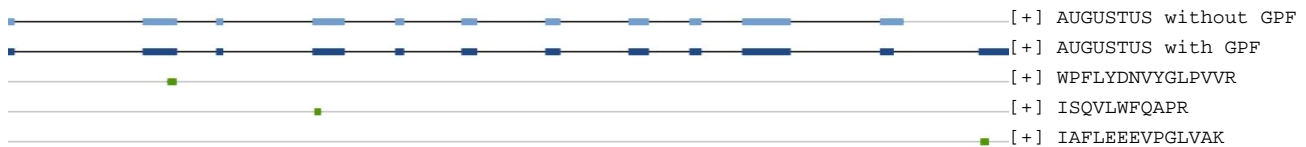

[GBrowse](#)

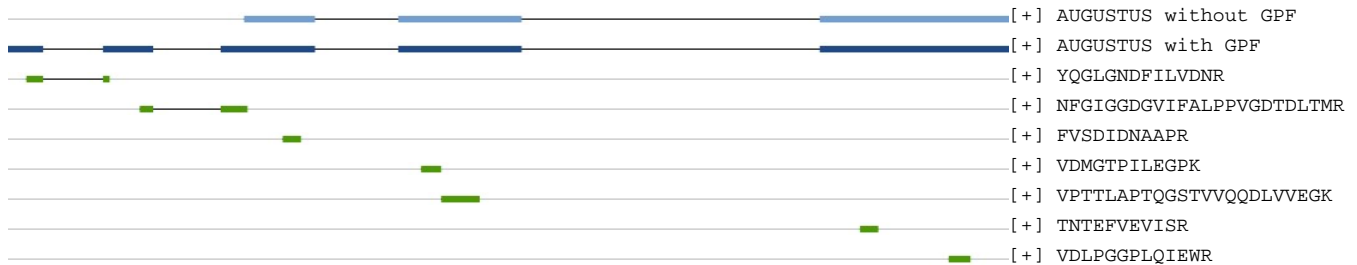

[GBrowse](#)

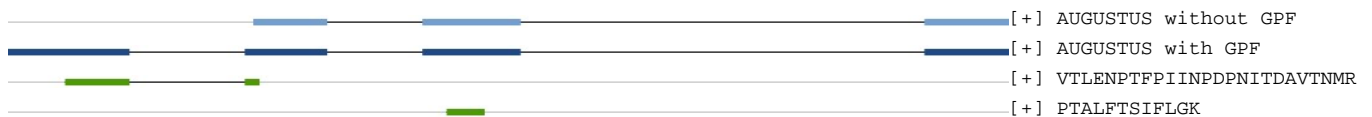

[GBrowse](#)

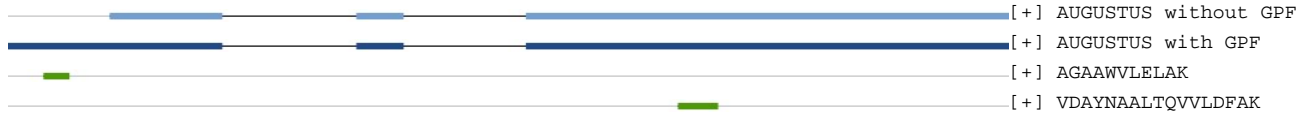

[GBrowse](#)

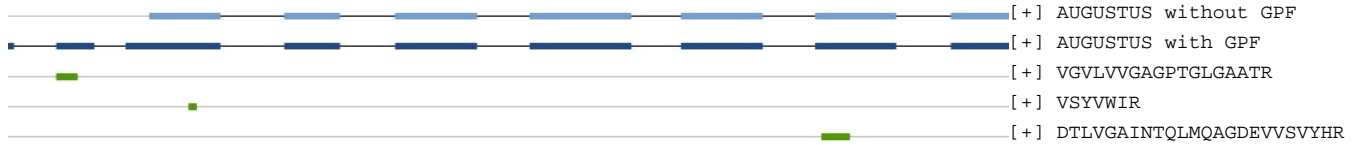

[GBrowse](#)

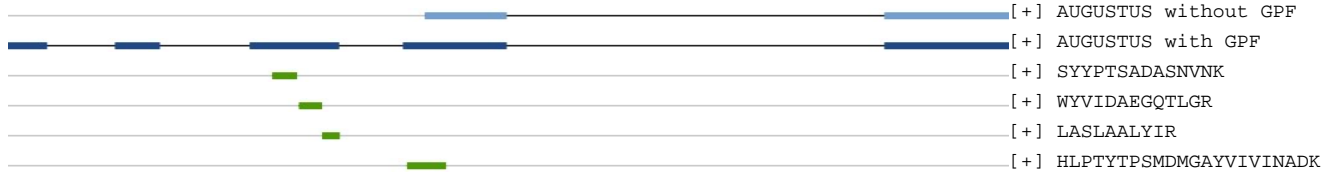

[GBrowse](#)

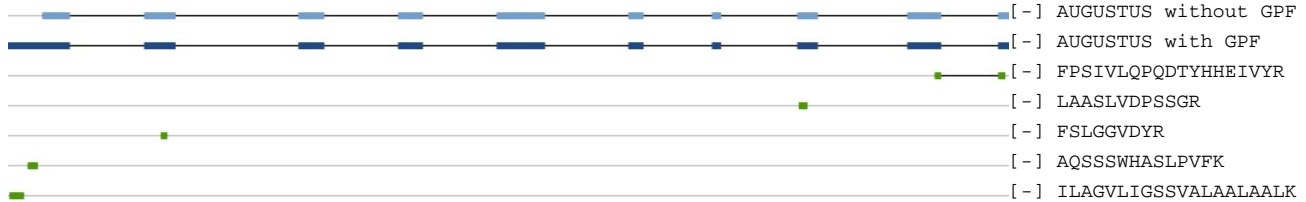

[GBrowse](#)

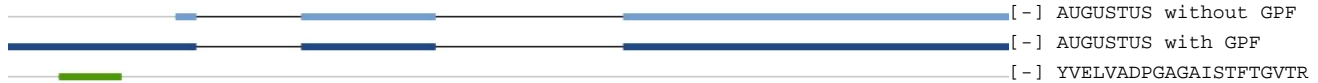

[GBrowse](#)

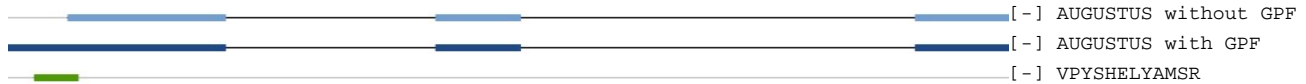

[GBrowse](#)

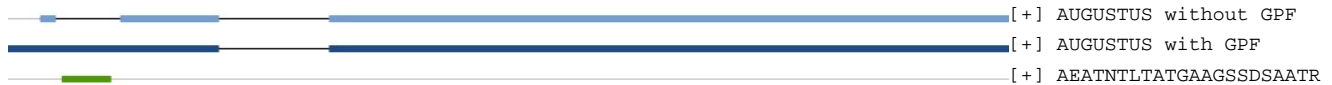

[GBrowse](#)

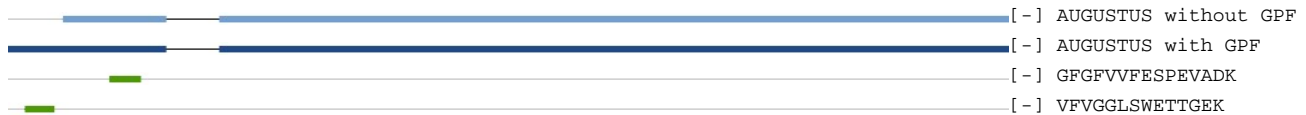

[GBrowse](#)

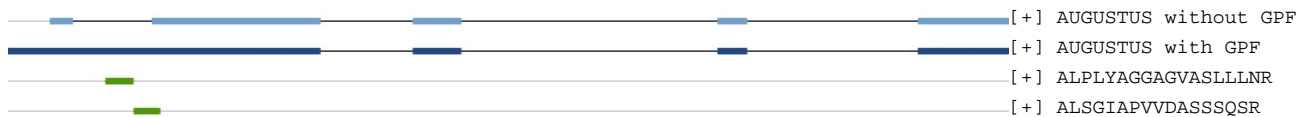

[GBrowse](#)

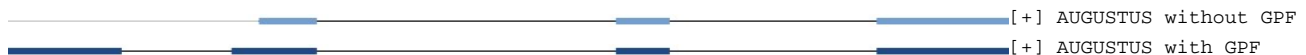


  
 [+] EWQDFLDVAEK
   
 [+] TMYDDYAANAEEPIIYK
   
 [+] DPSELQAAATSVEAR

[GBrowse](#)

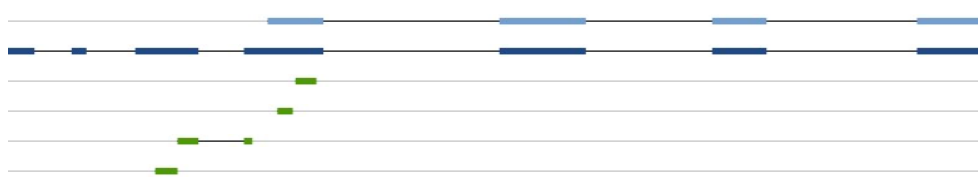
  
 [-] AUGUSTUS without GPF
   
 [-] AUGUSTUS with GPF
   
 [-] SGSYSL SINAAVEK
   
 [-] SLGLAAYAVGK
   
 [-] AVLANPQVPAAGSLDVLSVK
   
 [-] GADGSAISTLTGTYPK

[GBrowse](#)

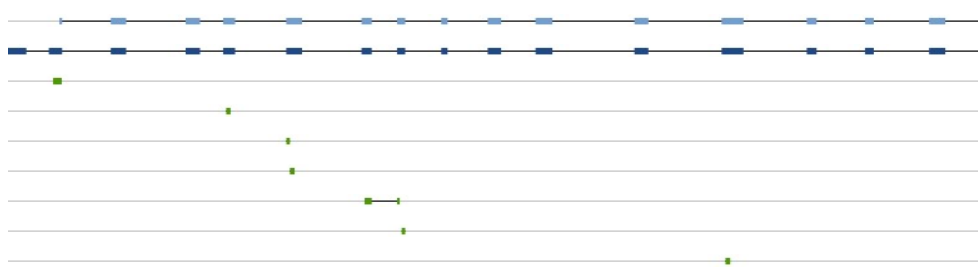
  
 [+] AUGUSTUS without GPF
   
 [+] AUGUSTUS with GPF
   
 [+] GAGTSFTSPGWLTQLNMLWGGK
   
 [+] GFAISGGDAWK
   
 [+] AYLEAMLDLDR
   
 [+] VFGASSLFAADK
   
 [+] SVFNDFNSLTSDSPVIQAVYTALK
   
 [+] ATDLLPLWK
   
 [+] LSPTMADYQQLR

[GBrowse](#)


  
 [+] AUGUSTUS without GPF
   
 [+] AUGUSTUS with GPF
   
 [+] FAAMGDQFR

[GBrowse](#)

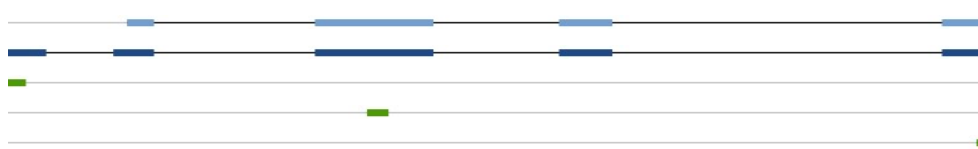
  
 [+] AUGUSTUS without GPF
   
 [+] AUGUSTUS with GPF
   
 [+] MMEFITETYK
   
 [+] TGEVVFNLDGR
   
 [+] YALIGVLGLLVLTK

[GBrowse](#)

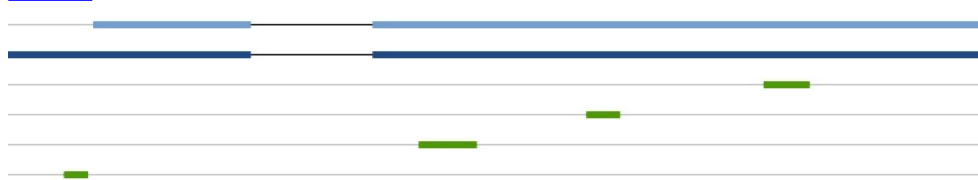
  
 [-] AUGUSTUS without GPF
   
 [-] AUGUSTUS with GPF
   
 [-] TNNELPPSDQIITAQPDIR
   
 [-] FGNELFVANAGDSR
   
 [-] ESNEDEGE GGGVSTTDALDLR
   
 [-] FGGAMQWR

[GBrowse](#)

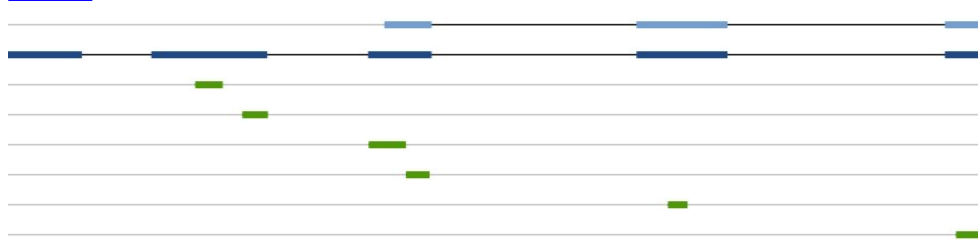
  
 [+] AUGUSTUS without GPF
   
 [+] AUGUSTUS with GPF
   
 [+] GVDVSVSAGAGSAK
   
 [+] VAASSLVLQDVSRL
   
 [+] ISTAHSAFMNYLLTLTHER
   
 [+] YSVLATWPDFTK
   
 [+] FYSMVDFEHR
   
 [+] HNTVHPALGPATADGAVVQFLLAHAK

### Gene truncation (2 cases)

[GBrowse](#)


  
 [+] AUGUSTUS without GPF
   
 [+] AUGUSTUS with GPF
   
 [+] ADGGAGAAQLLETGTAAK
   
 [+] LVEEAVEAEGAER

[GBrowse](#)

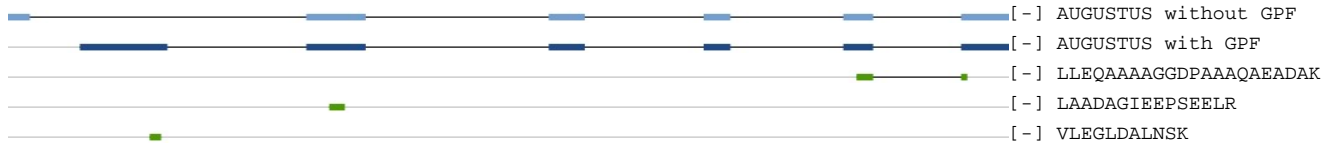

### Gene internal adjustments (added exons) (6 cases)

[GBrowse](#)

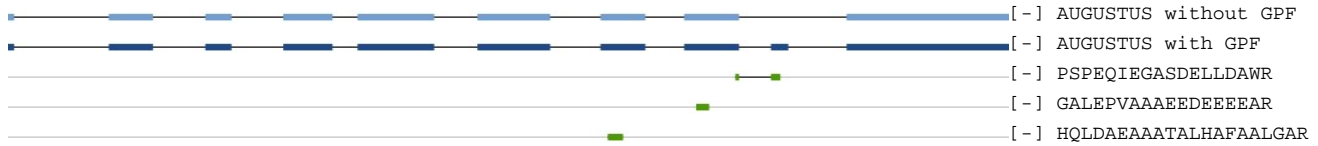

[GBrowse](#)

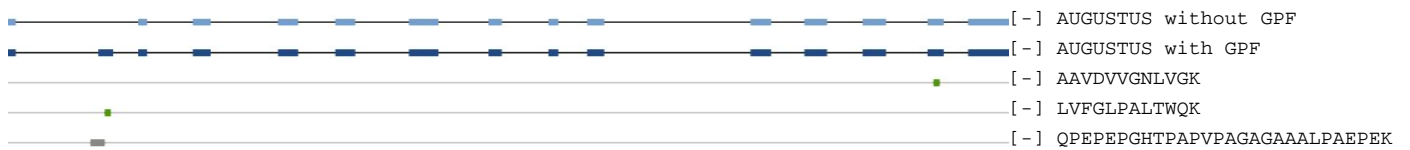

[GBrowse](#)

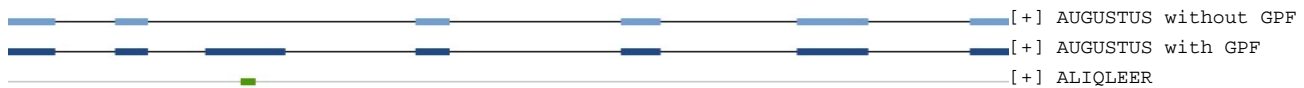

[GBrowse](#)

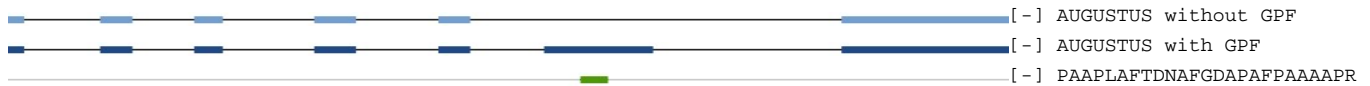

[GBrowse](#)

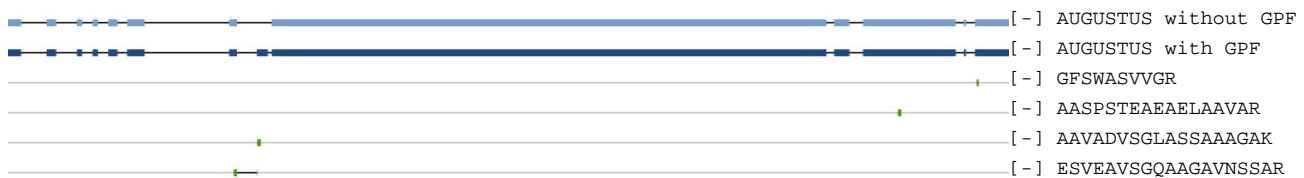

[GBrowse](#)

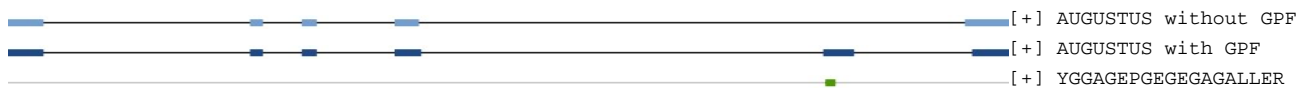

### Gene internal adjustments (miscellaneous) (8 cases)

[GBrowse](#)

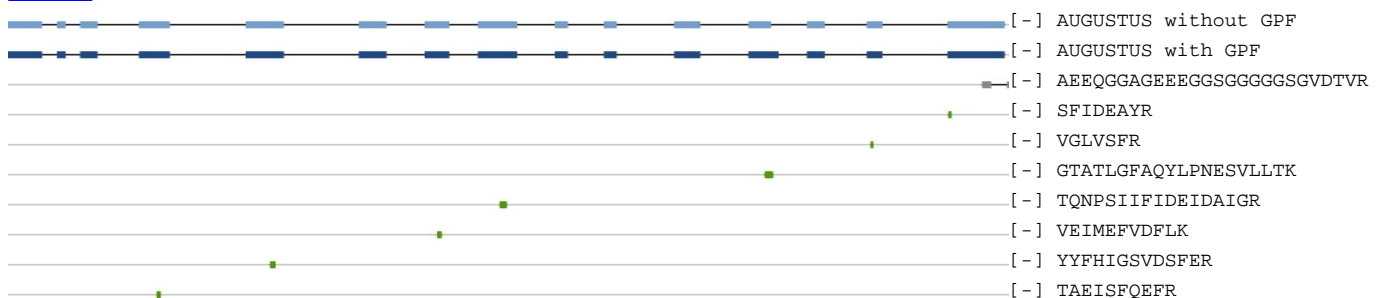



[GBrowse](#)

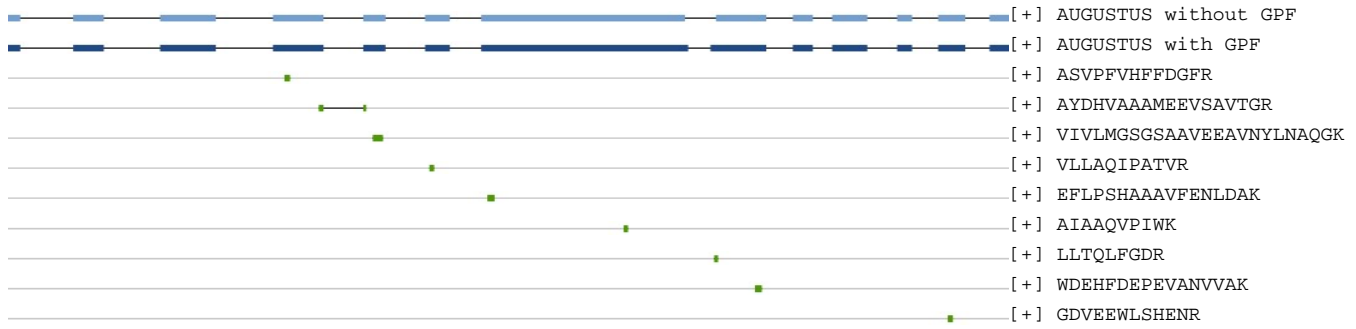

[GBrowse](#)

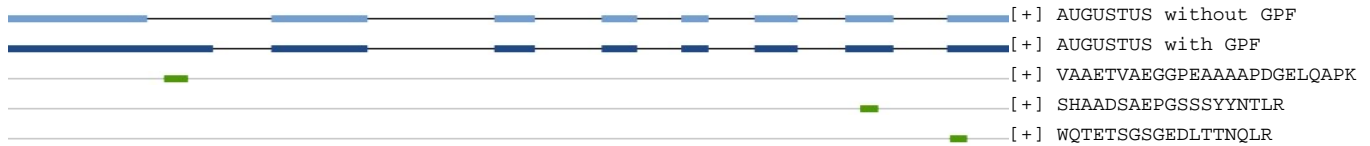

[GBrowse](#)

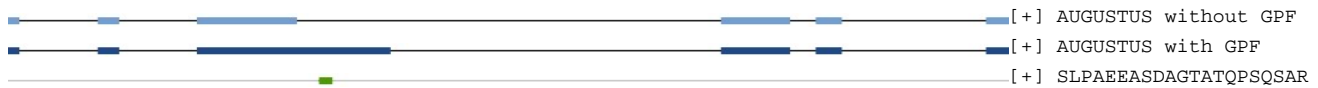

[GBrowse](#)

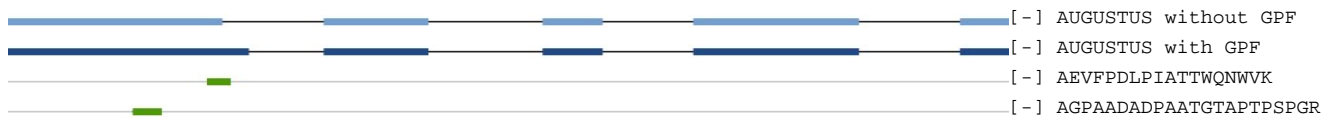

[GBrowse](#)

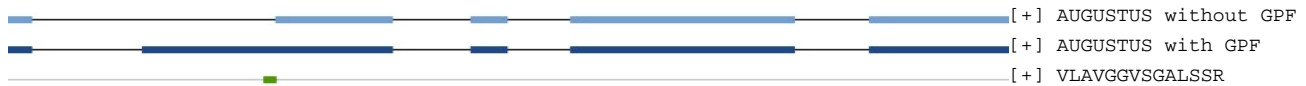

[GBrowse](#)

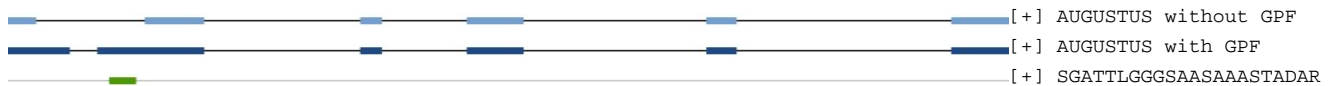

[GBrowse](#)

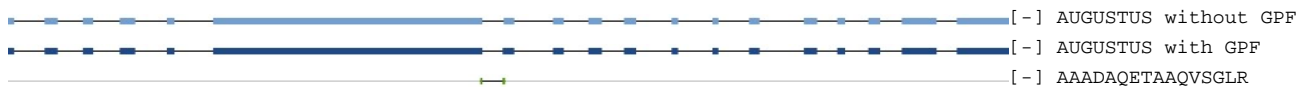

### Gene internal adjustments (removed exons) (4 cases)

[GBrowse](#)

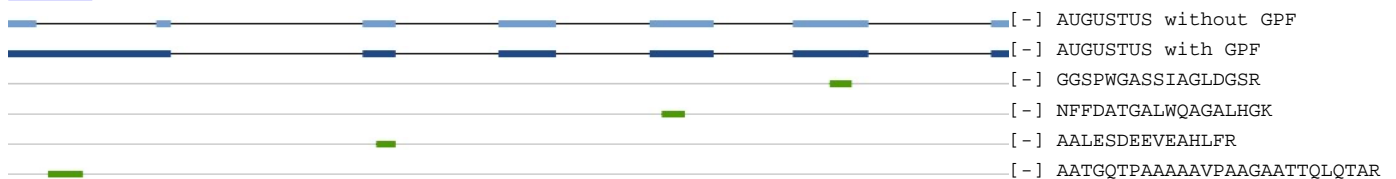

[GBrowse](#)

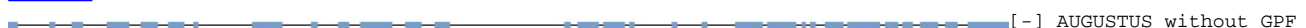

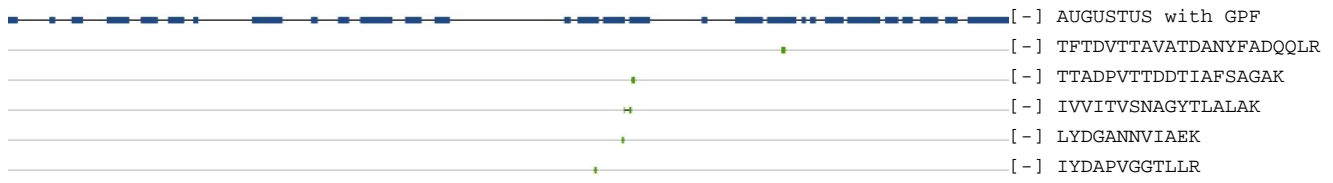

[GBrowse](#)

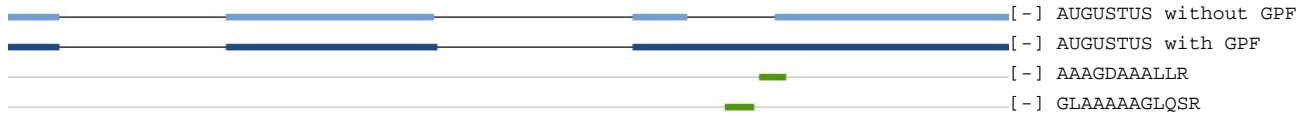

[GBrowse](#)

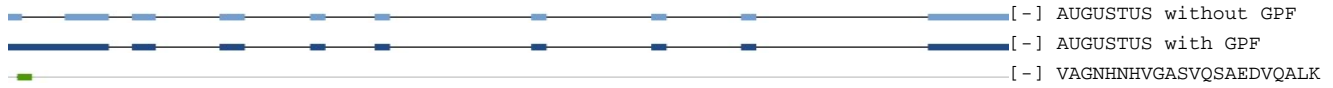

Supplement: NIHMS305750-supplement-Supplemental.pdf [file NIHMS305750-supplement-Supplemental.pdf]
